# Supplementary material
Source: PubMed Central journal article supplement (PMC5984490)

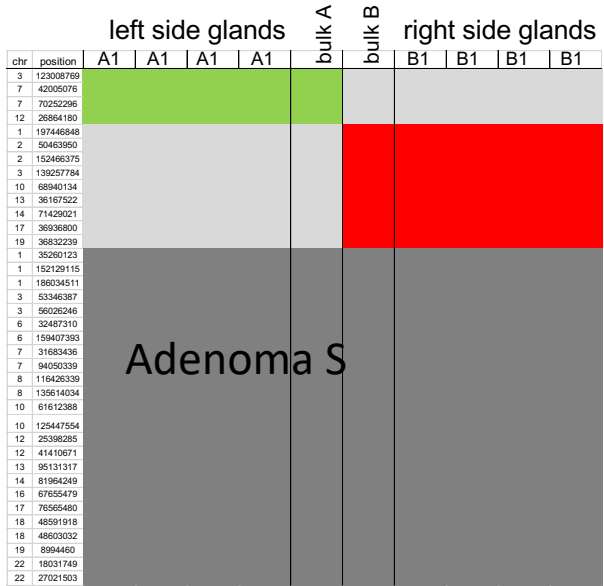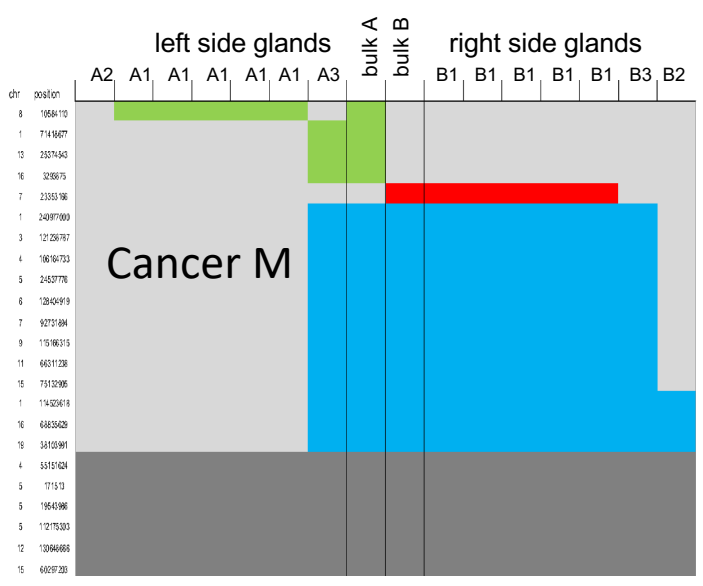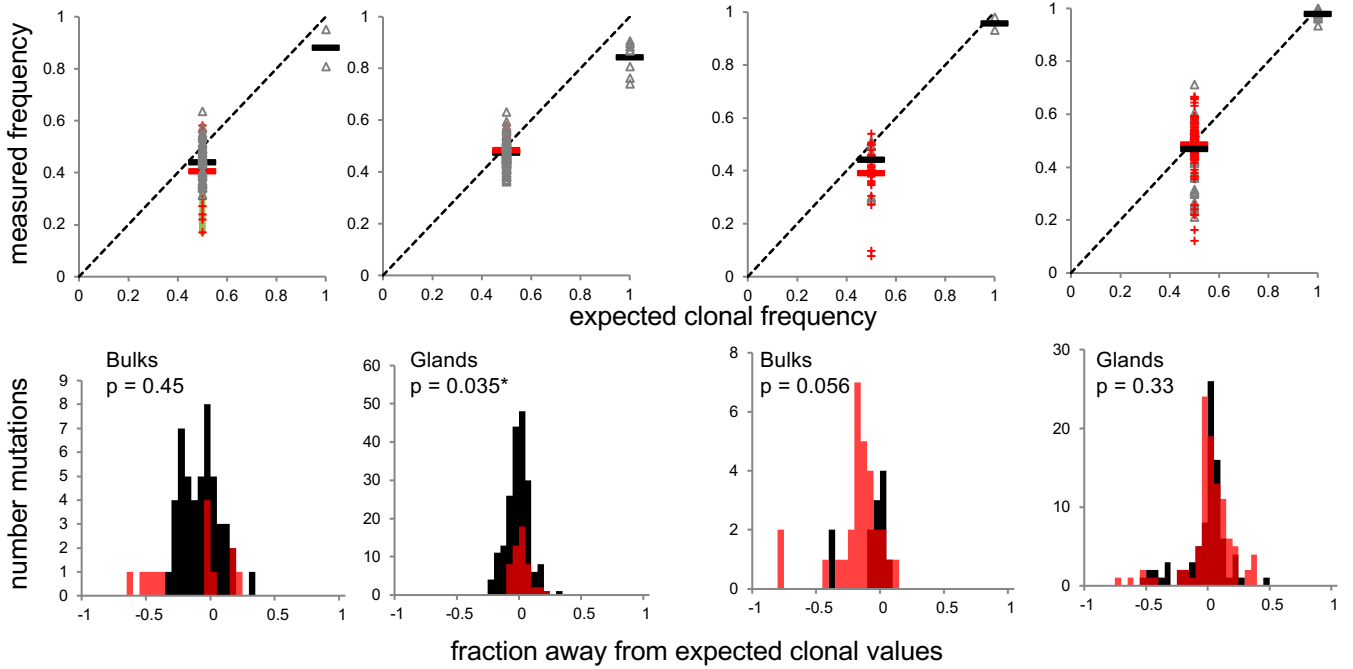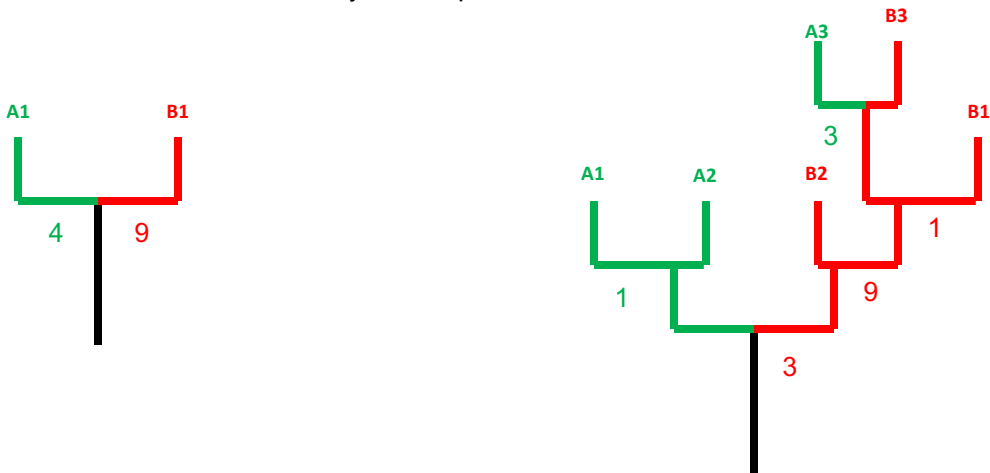

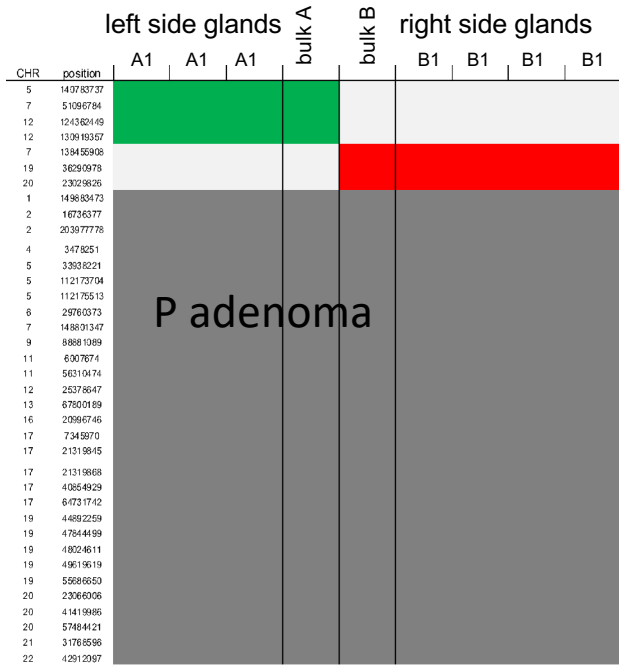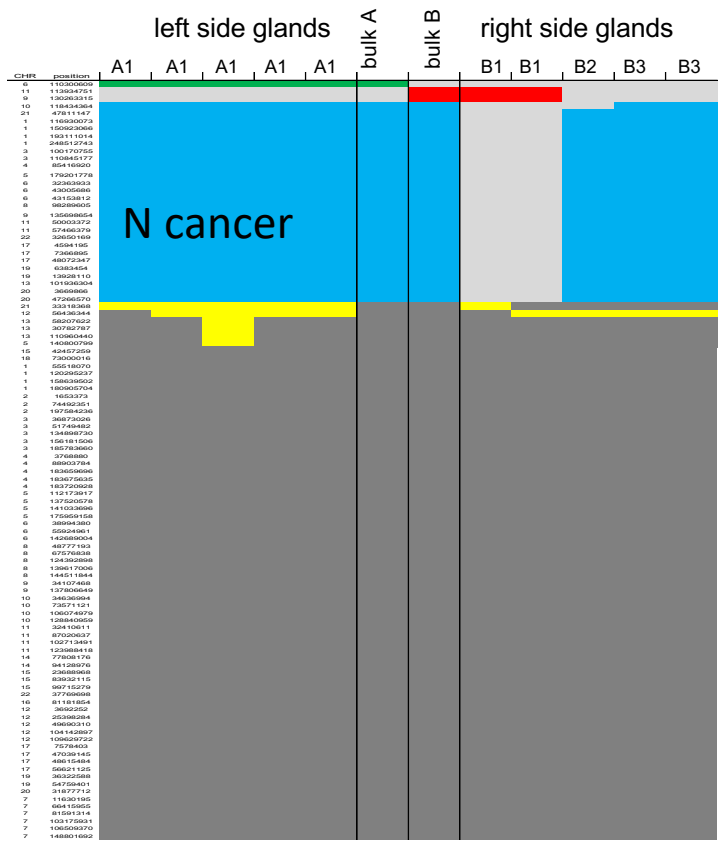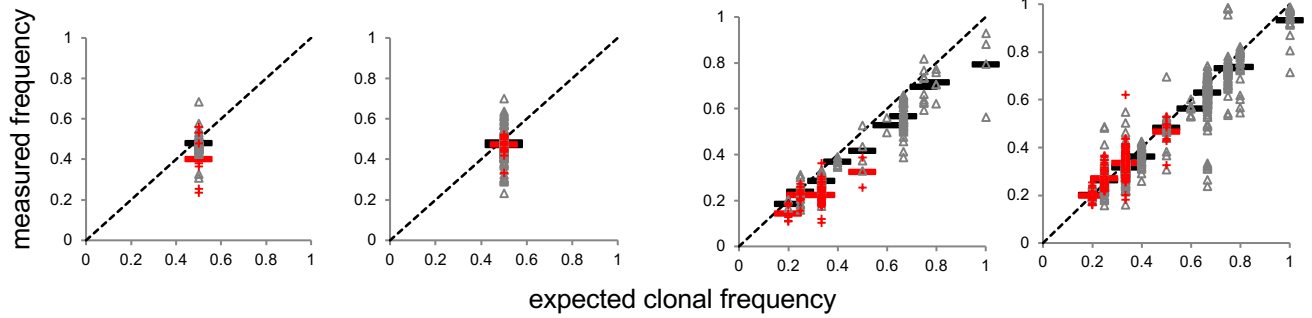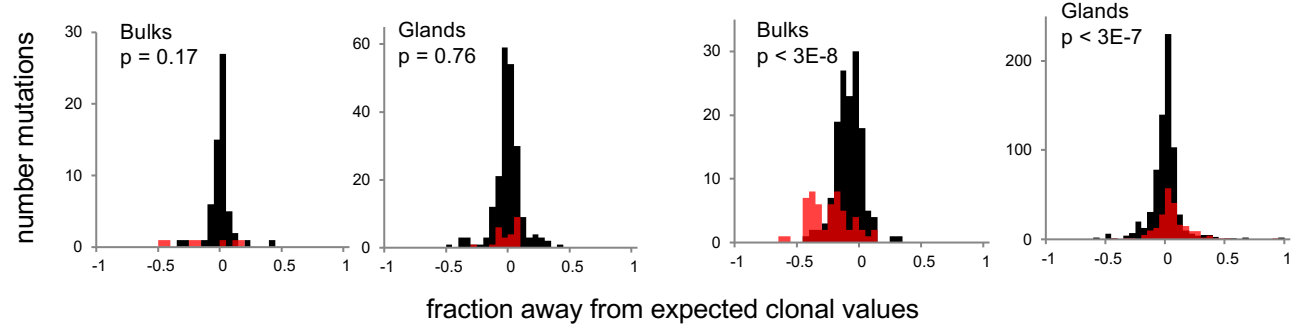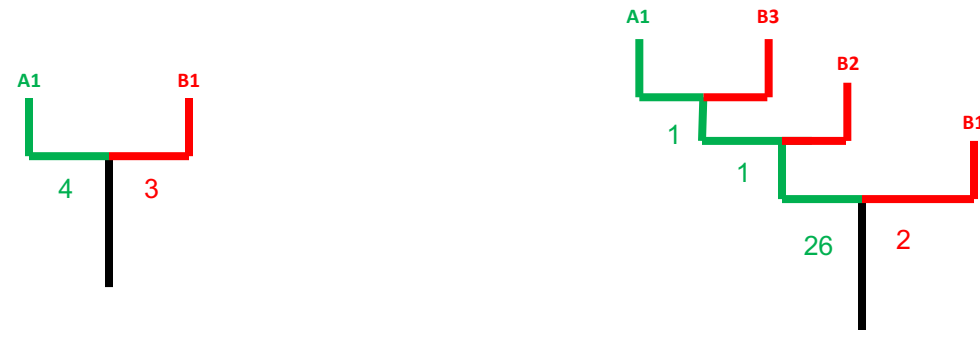

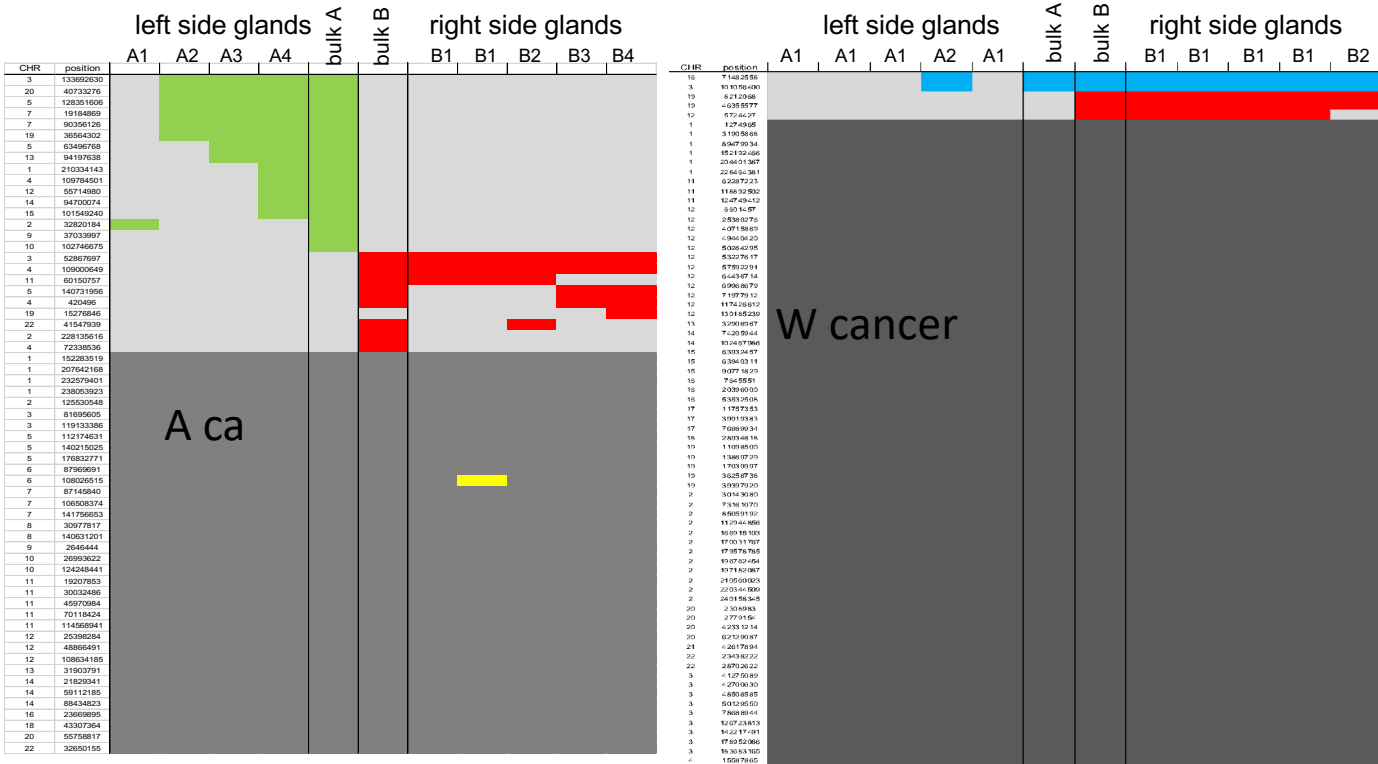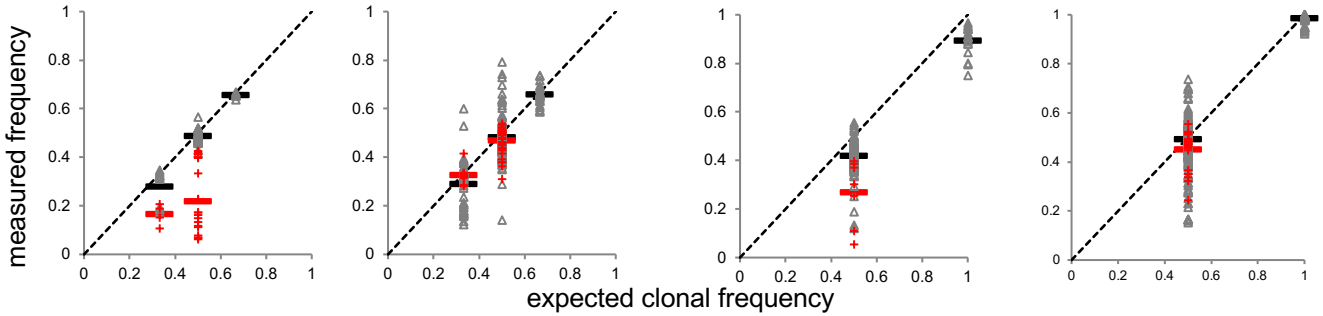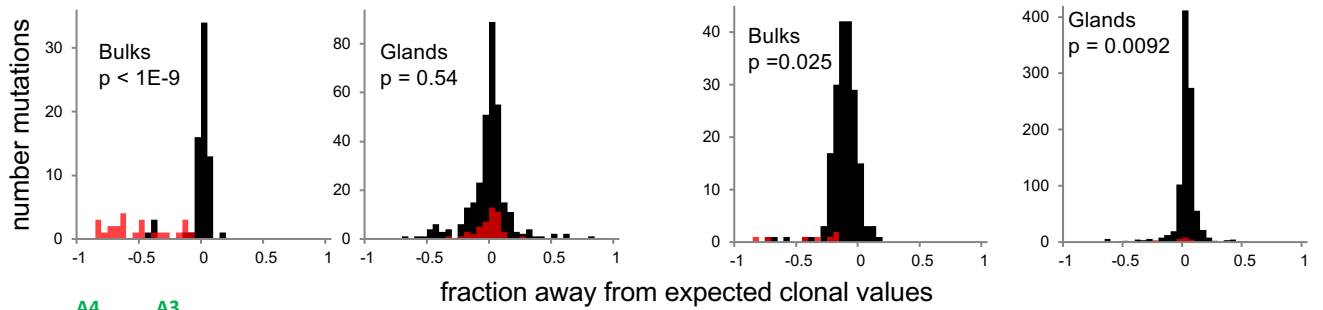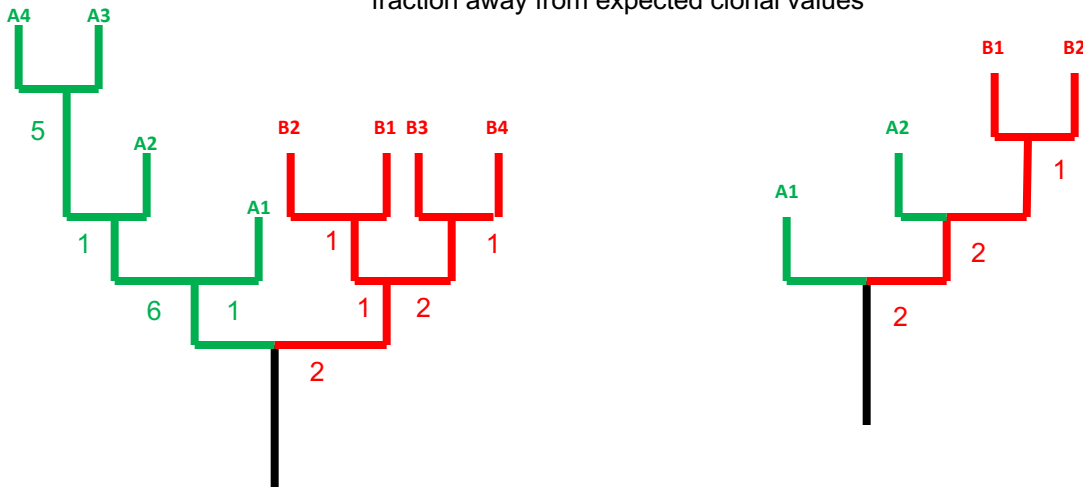

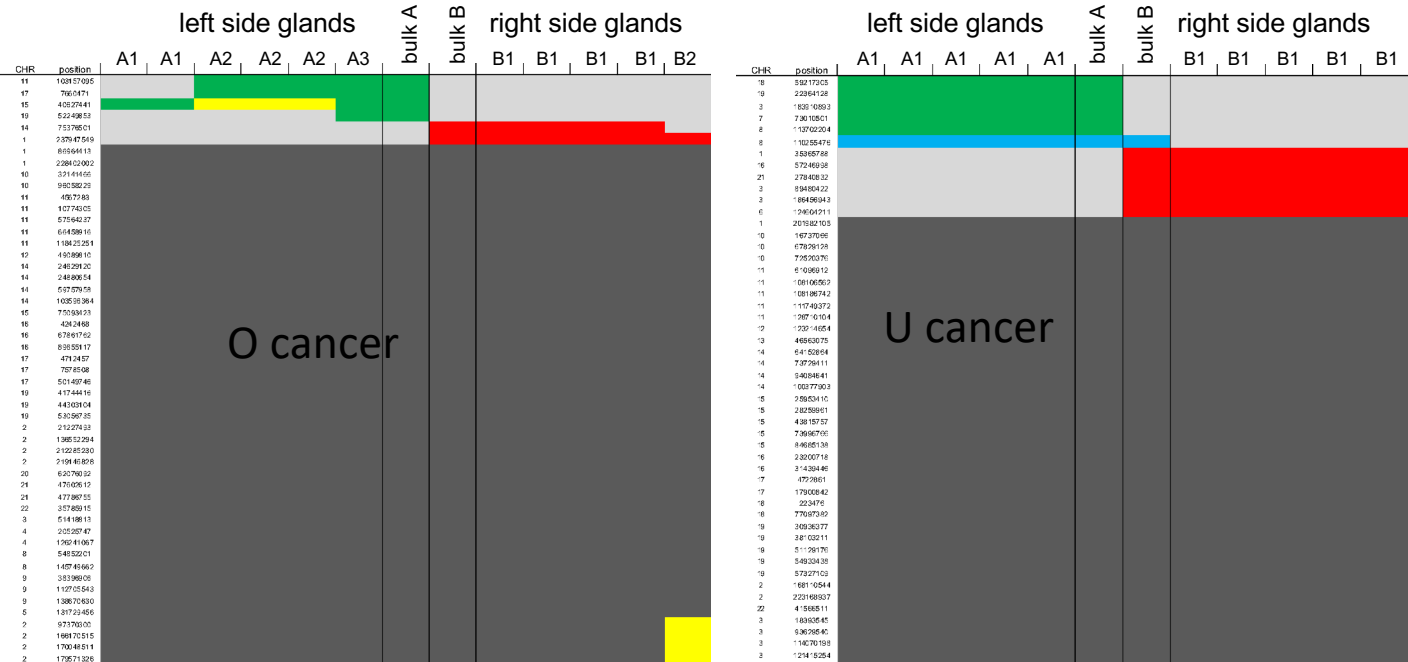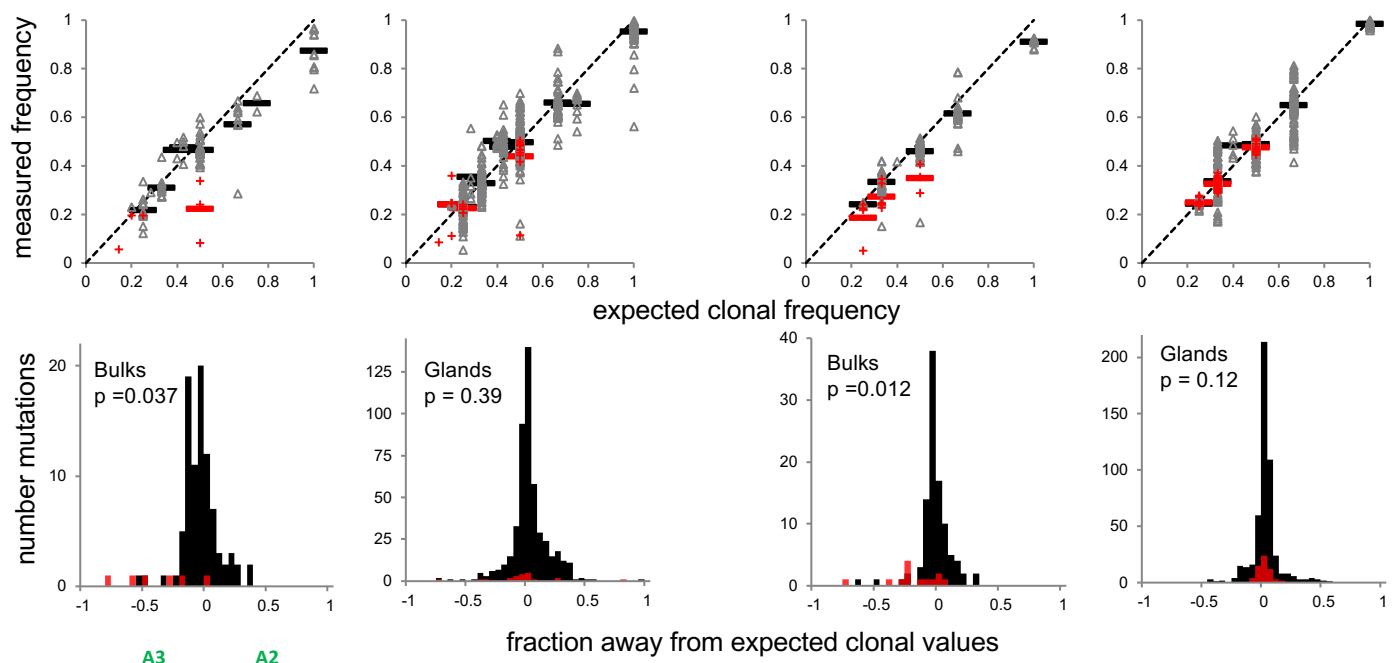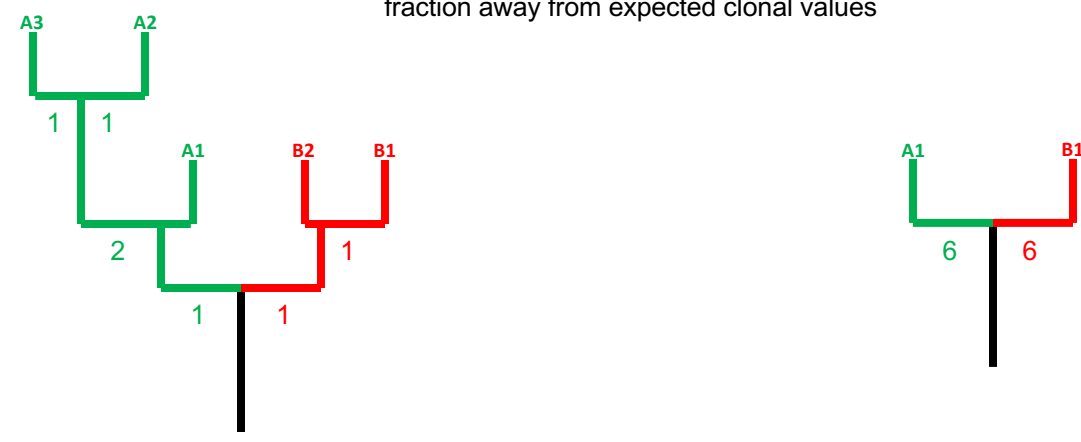

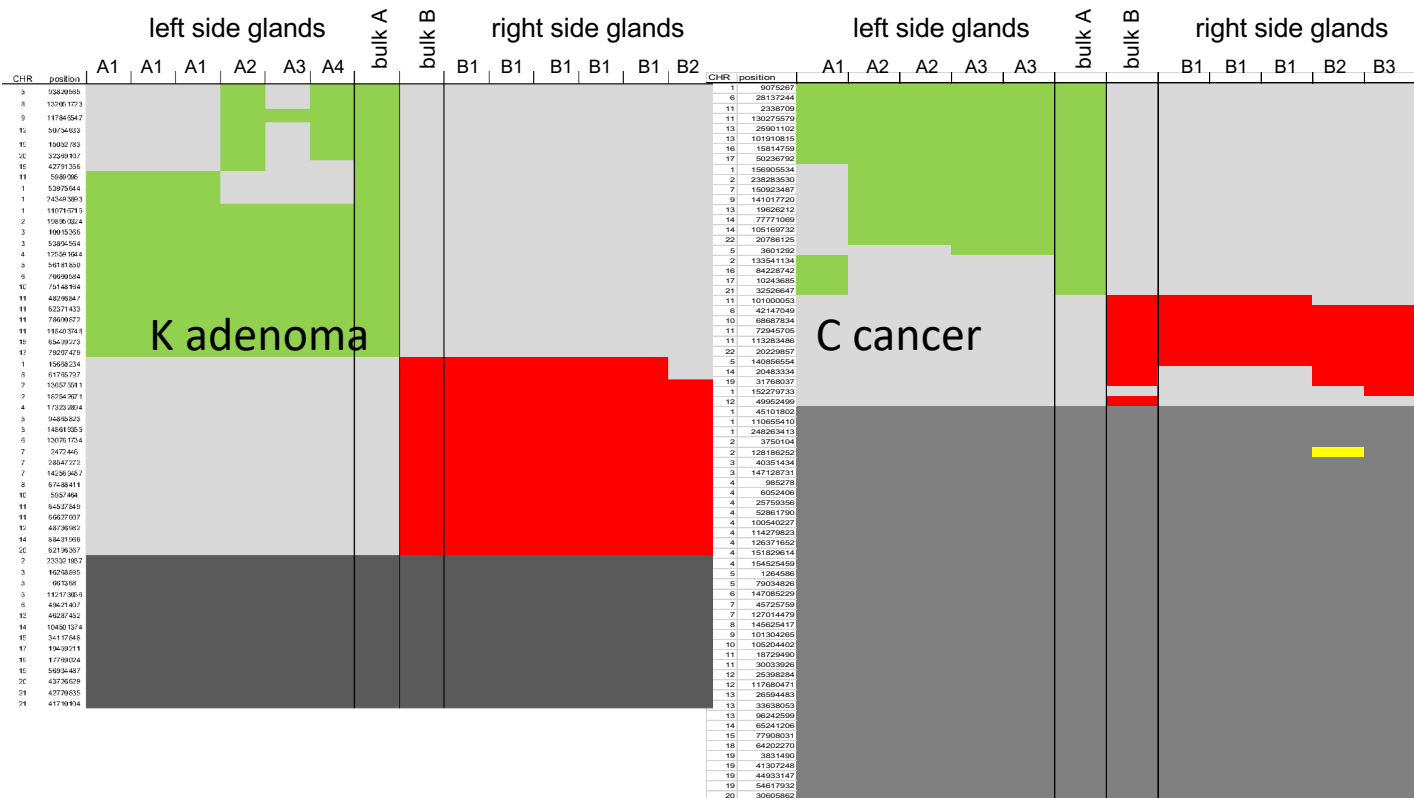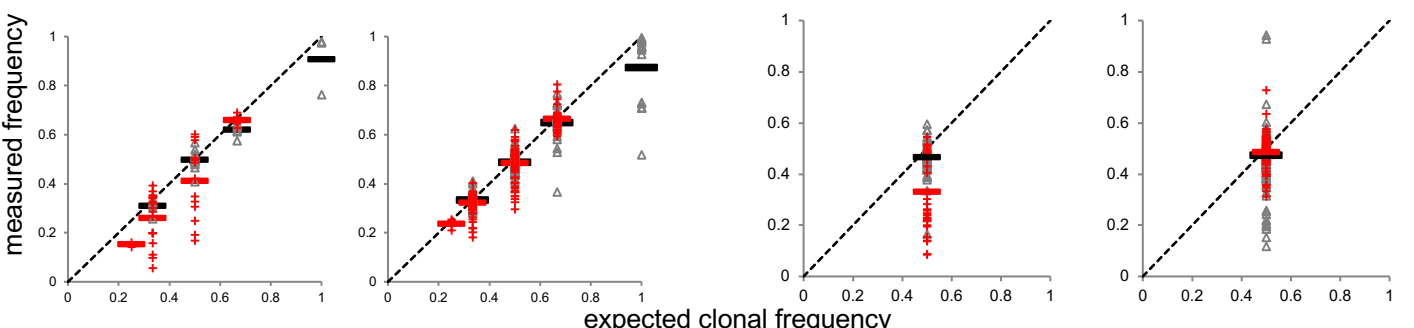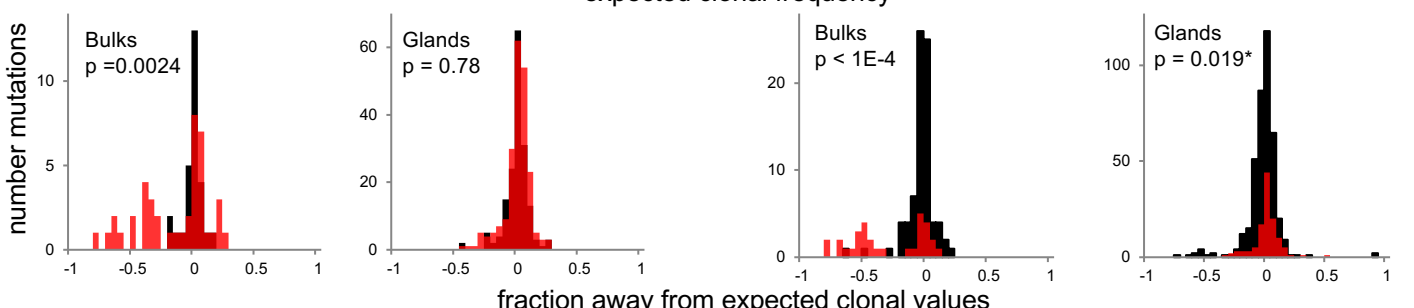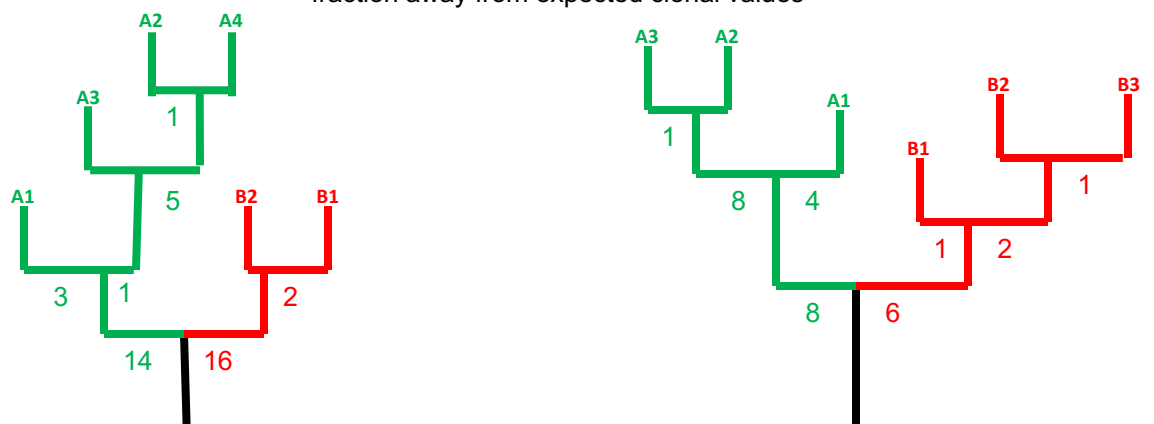

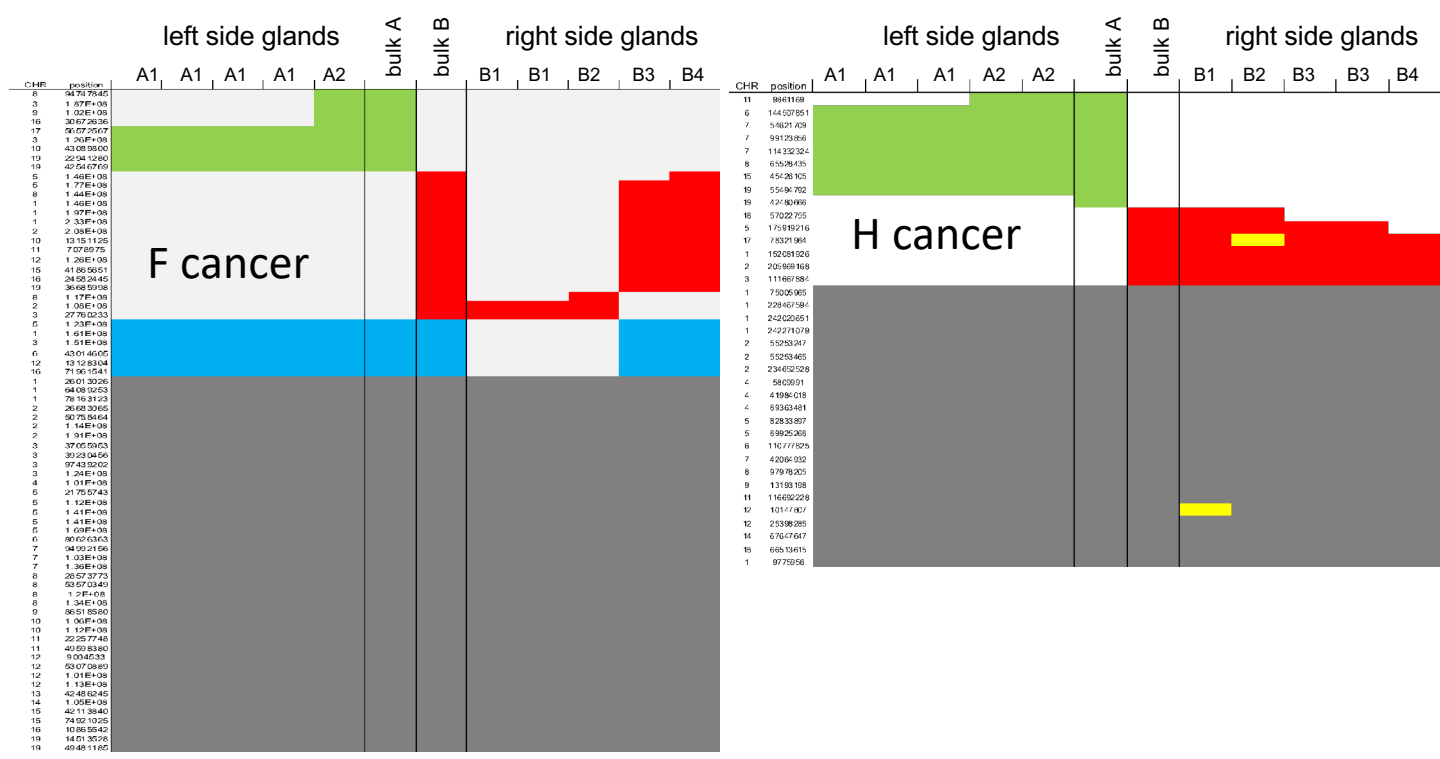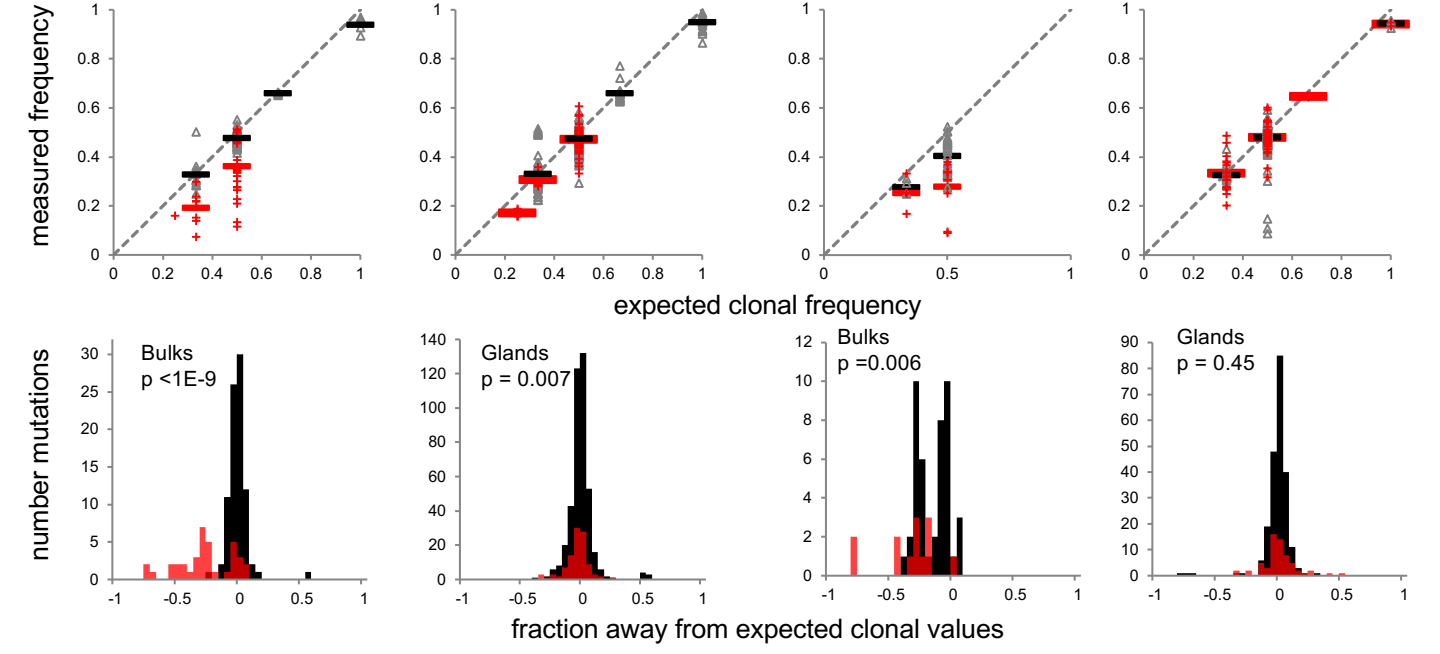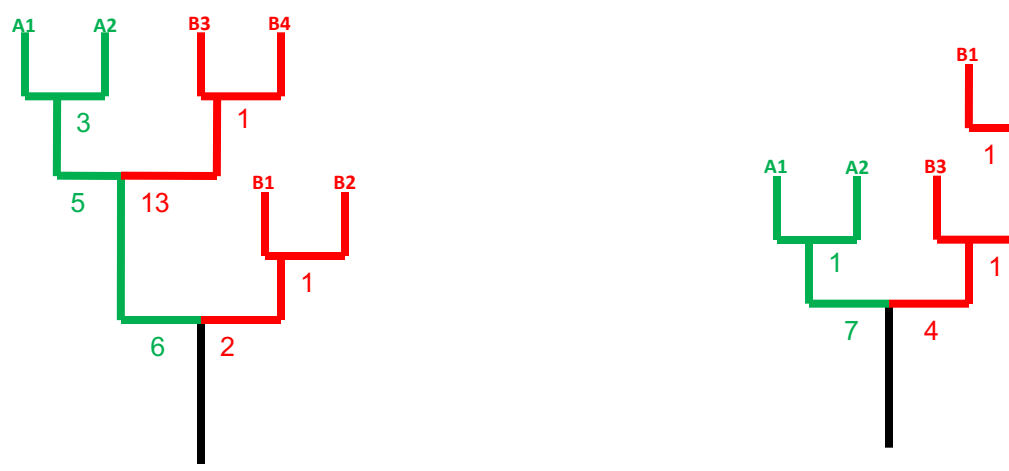

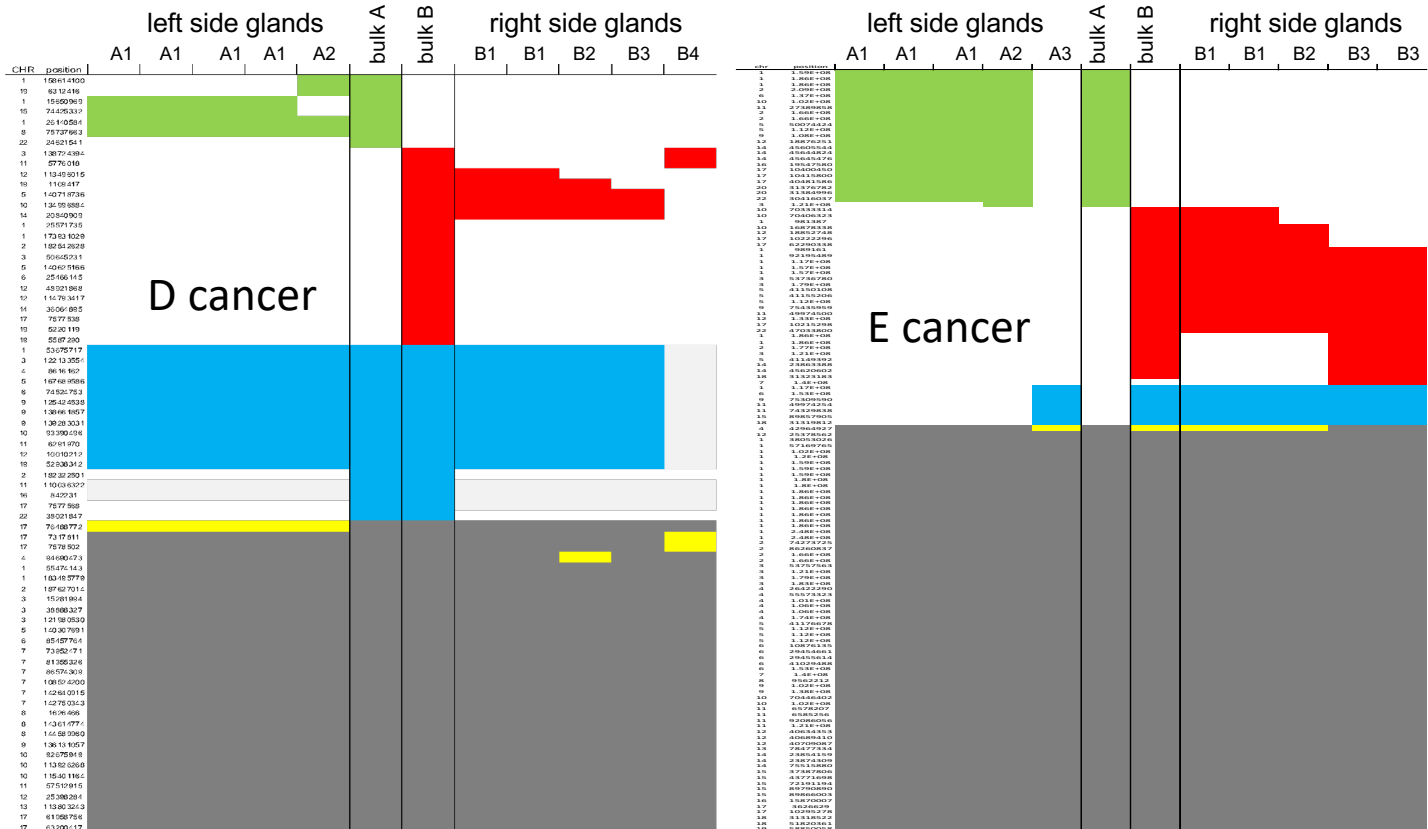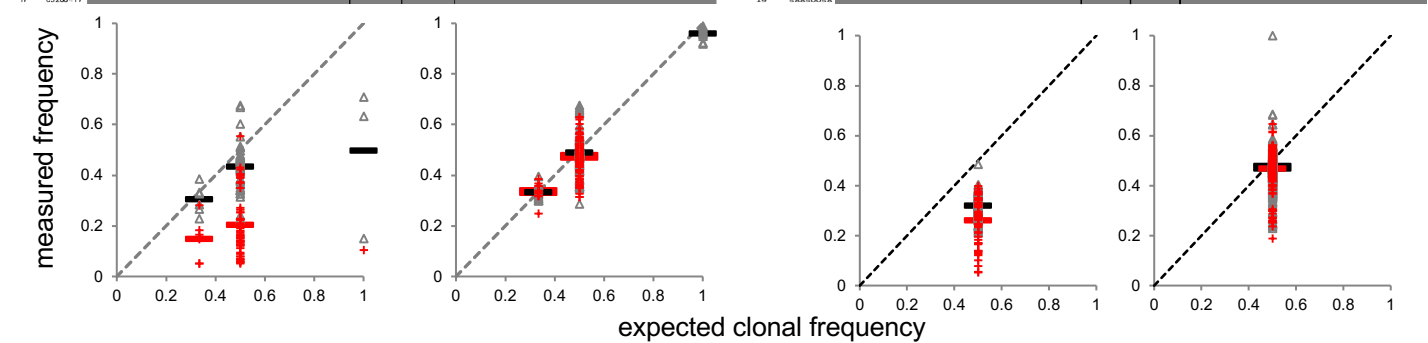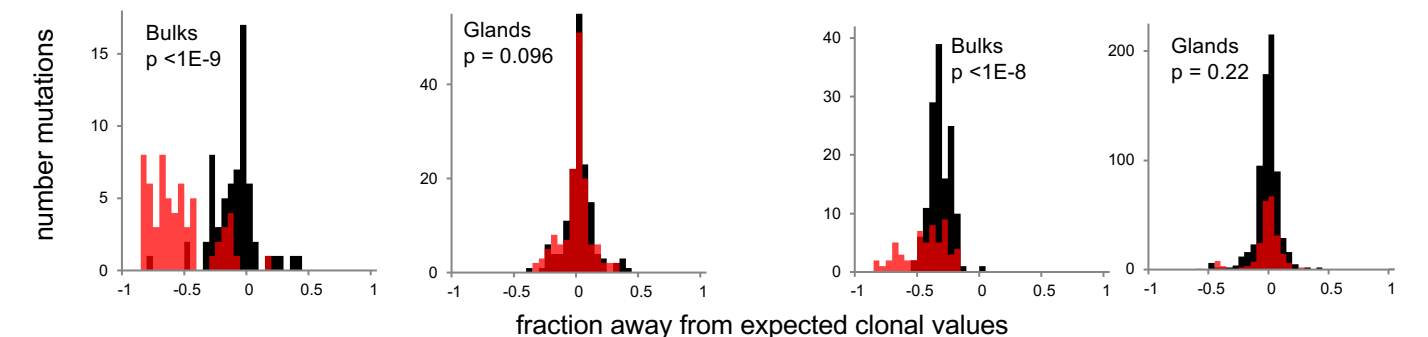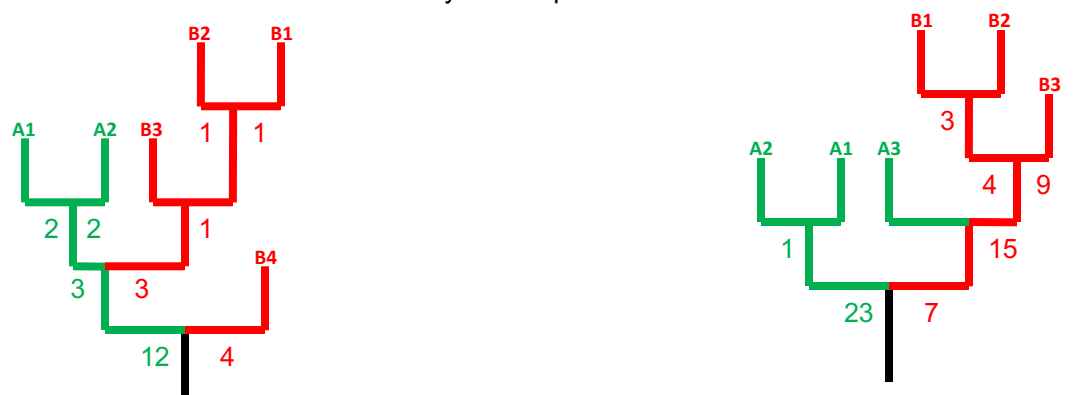

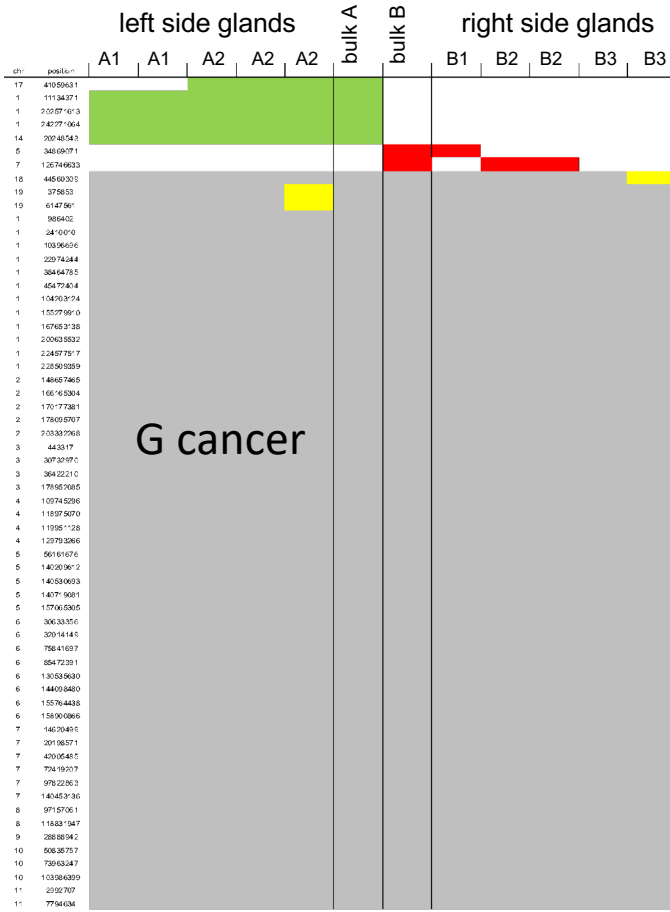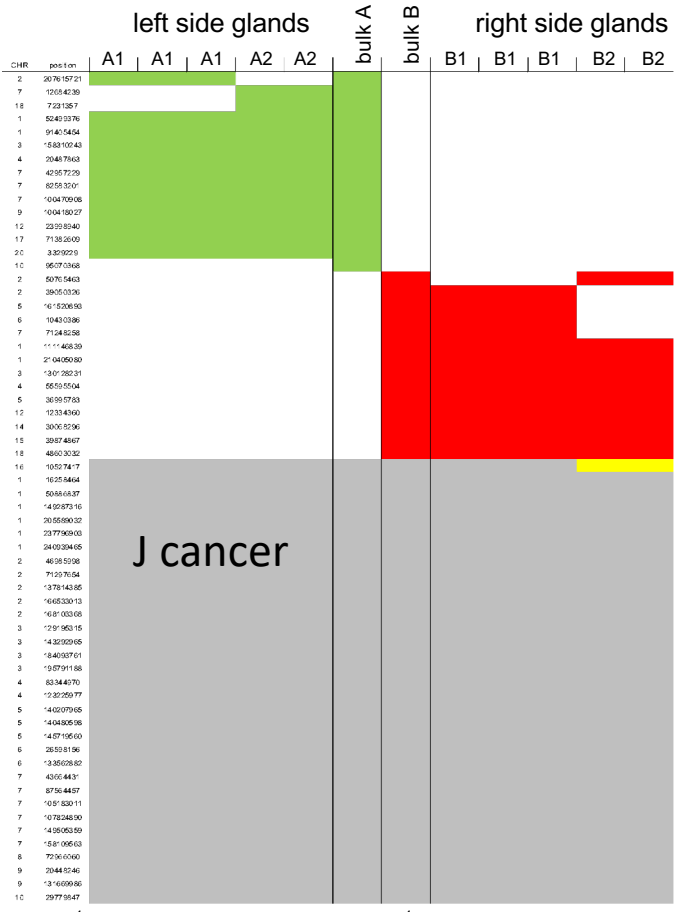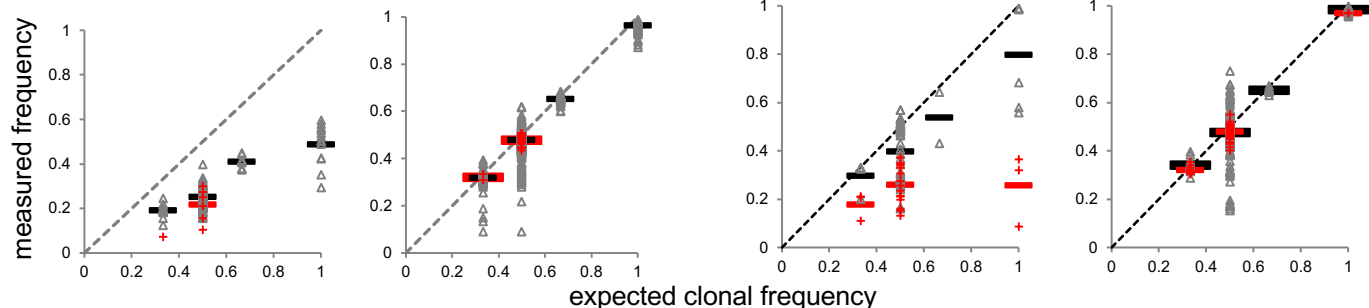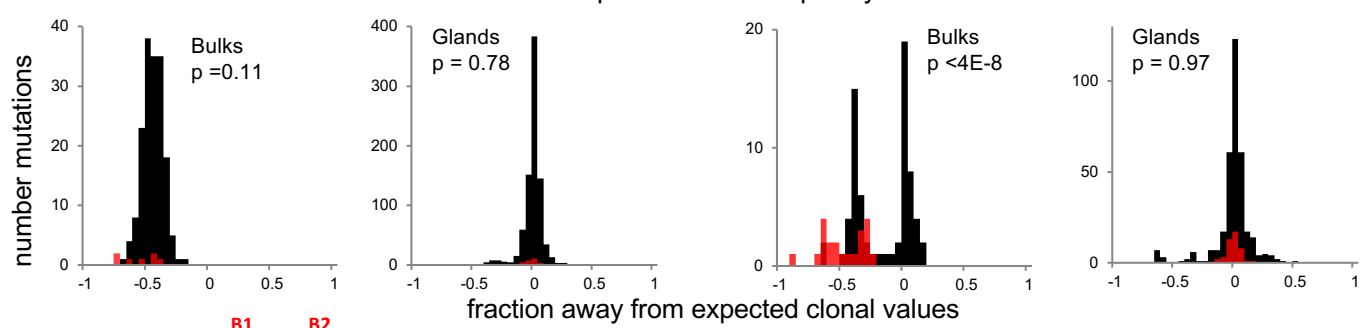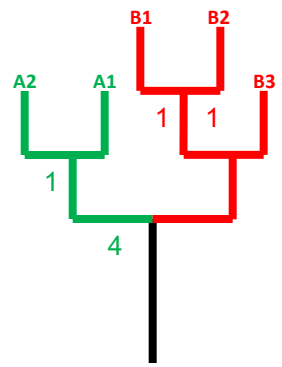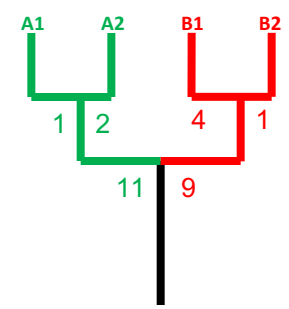



left side glands      bulk A      bulk B      right side glands

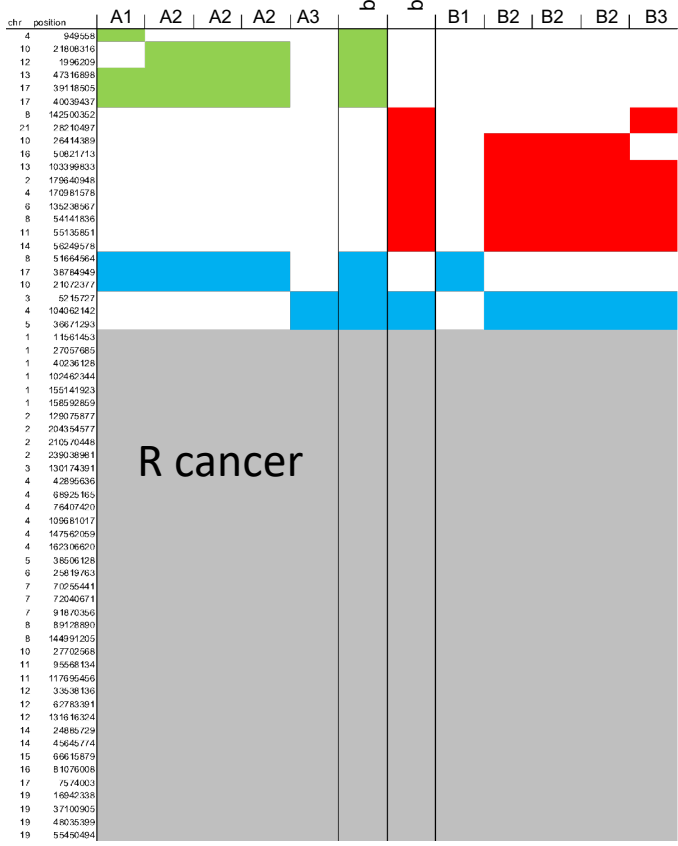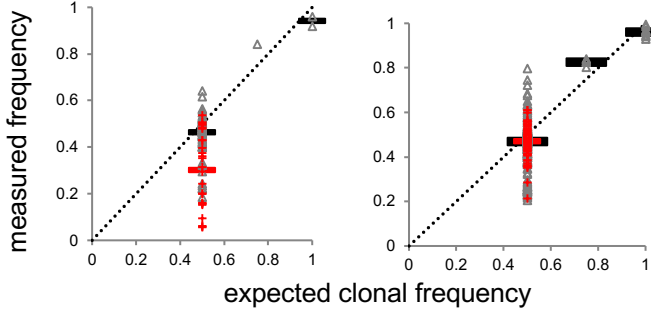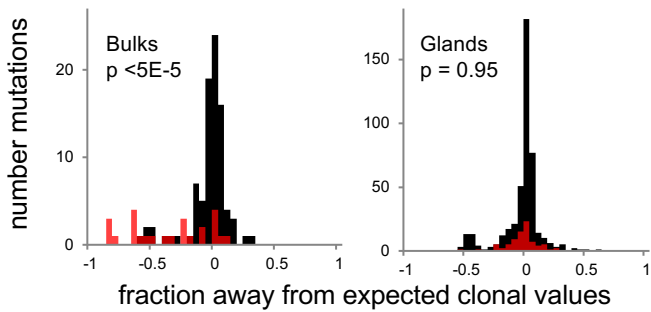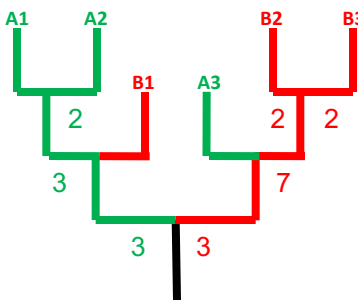

Supplement: pnas.1716552115.sd01.pdf [file pnas.1716552115.sd01.pdf]
